# Supplementary material for: Synthesis of Palladium Nanoparticles Supported over Fused Graphene-like Material for Hydrogen Evolution Reaction
Source: MDPI journal article supplement (doi:10.3390/catal13071117), 2023-07-17
Supplement: s1 [file s1]

## Supplementary Material

# Synthesis of Palladium Nanoparticles Supported over Fused Graphene-Like Material for Hydrogen Evolution Reaction

Qui Quach <sup>1,2</sup>, Erik Biehler <sup>1,2</sup> and Tarek M. Abdel-Fattah <sup>1,2,\*</sup>

<sup>1</sup> Applied Research Center at Thomas Jefferson National Accelerator Facility, Newport News, VA 23606, USA

<sup>2</sup> Department of Molecular Biology and Chemistry at Christopher Newport University, Newport News, VA 23606, USA

\* Correspondence: fattah@cnu.edu

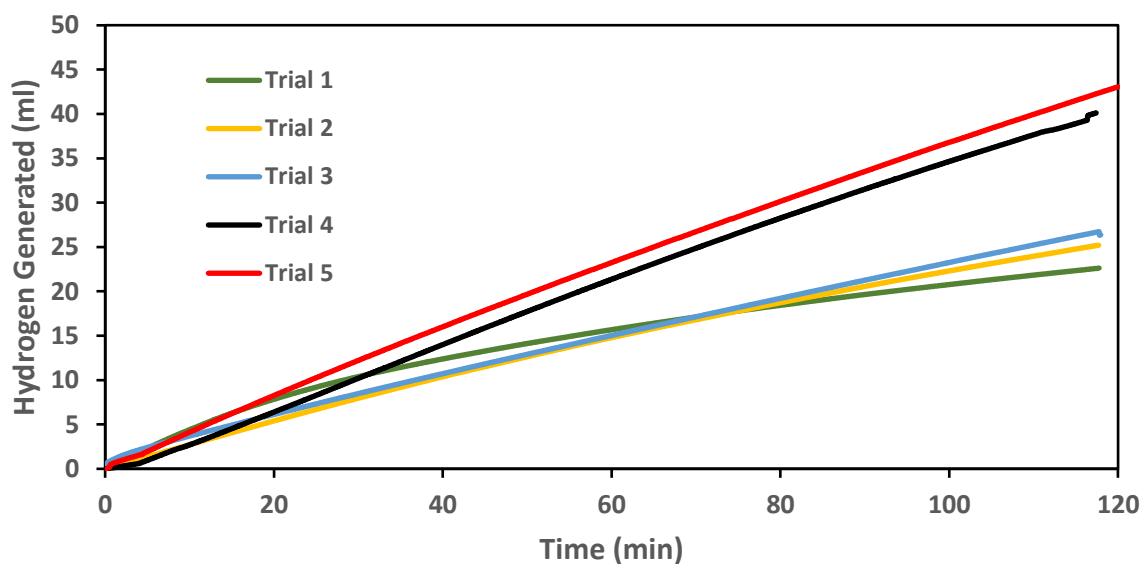

**Figure S1:** Catalytic reusability of PdFGLM after 5 consecutive trials.

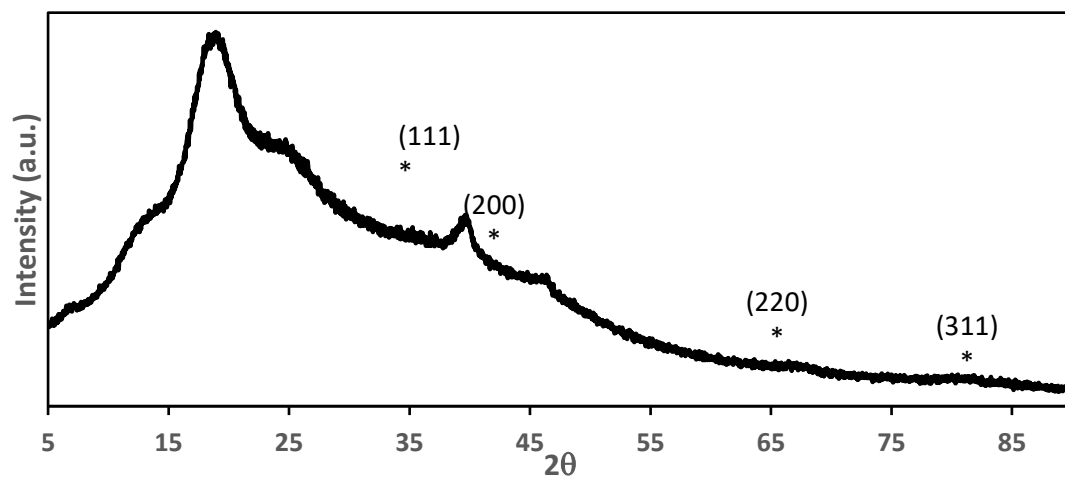

**Figure S2:** P-XRD of PdFGLM after reusability trials.

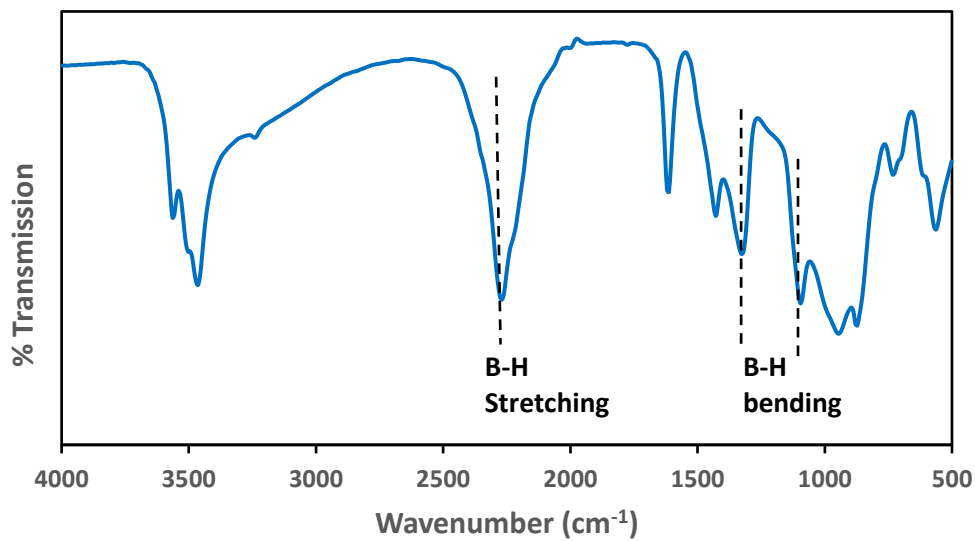

**Figure S3:** FTIR of sodium borohydride ( $\text{NaBH}_4$ ).

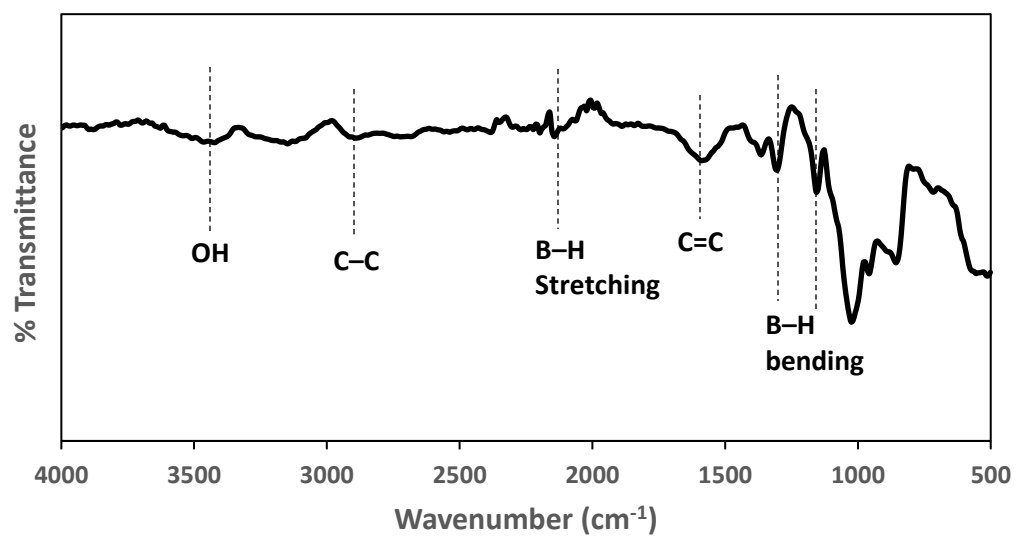

**Figure S4:** FTIR of PdFGLM after reusability trials.
